# Supplementary material
Source: bioRxiv or medRxiv preprint supplement (https://medrxiv.org/highwire/filestream/89247/field_highwire_adjunct_files/0/2020.07.10.20147777-1.pdf)
Supplement: Supplementary file [file 2020.07.10.20147777-1.pdf]

Supplementary Information for

## COVID-19 severity is predicted by earlier evidence of accelerated aging

Chia-Ling Kuo<sup>1,2</sup>, Luke C. Pilling<sup>2,3</sup>, Janice L Atkins<sup>3</sup>, Jane AH Masoli<sup>3</sup>, João Delgado<sup>3</sup>, Christopher Tiganelli<sup>4</sup>, George A Kuchel<sup>2</sup>, David Melzer<sup>2,3</sup>, Kenneth B Beckman<sup>5</sup>, Morgan E. Levine<sup>6,7</sup>

Morgan E. Levine

Email: [morgan.levine@yale.edu](mailto:morgan.levine@yale.edu)

**This PDF file includes:**

Tables S1 to S4

**Table S1.** Odds ratios (ORs) for test positivity or all-cause mortality with test confirmed COVID-19 comparing participants with a particular disease to those without the disease, adjusted for sex, current age (attained age on April 26, 2020, when the last death occurred in the data), ethnicity, and baseline assessment center

|                          | Test Positivity      |          | All-Cause Mortality with Test Confirmed COVID-19 |          |
|--------------------------|----------------------|----------|--------------------------------------------------|----------|
|                          | OR (95% CI)          | P-value  | OR (95% CI)                                      | P-value  |
| Dementia                 | 14.45 (10.64, 19.62) | 1.59E-65 | 17.23 (9.62, 30.83)                              | 9.33E-22 |
| Pneumonia                | 2.77 (2.30, 3.34)    | 9.44E-27 | 3.00 (1.92, 4.68)                                | 1.46E-06 |
| Type II Diabetes         | 2.32 (1.98, 2.71)    | 2.98E-26 | 3.63 (2.60, 5.05)                                | 2.93E-14 |
| Chronic Kidney Disease   | 3.50 (2.66, 4.61)    | 3.37E-19 | 2.69 (1.37, 5.29)                                | 0.004    |
| Atrial Fibrillation      | 2.33 (1.93, 2.82)    | 1.31E-18 | 2.31 (1.53, 3.48)                                | 6.09E-05 |
| Hypertension             | 1.61 (1.44, 1.79)    | 9.47E-18 | 2.41 (1.77, 3.26)                                | 1.82E-08 |
| COPD                     | 2.31 (1.90, 2.82)    | 1.15E-16 | 3.14 (2.07, 4.77)                                | 8.23E-08 |
| Coronary Artery Disease  | 1.69 (1.45, 1.96)    | 1.05E-11 | 1.67 (1.18, 2.37)                                | 0.004    |
| Depression               | 1.67 (1.42, 1.96)    | 4.62E-10 | 2.91 (1.97, 4.31)                                | 9.52E-08 |
| Delirium                 | 5.44 (3.13, 9.46)    | 2.04E-09 | 9.39 (3.83, 23.07)                               | 1.03E-06 |
| Liver Disease            | 2.18 (1.60, 2.97)    | 7.63E-07 | 2.14 (0.95, 4.84)                                | 0.067    |
| Stroke                   | 1.95 (1.45, 2.63)    | 9.64E-06 | 2.04 (1.07, 3.87)                                | 0.029    |
| Previous Falls/fractures | 1.25 (1.11, 1.41)    | 2.15E-04 | 1.73 (1.28, 2.34)                                | 3.76E-04 |
| Asthma                   | 1.19 (1.03, 1.37)    | 0.016    | 1.08 (0.71, 1.63)                                | 7.27E-01 |
| Rheumatoid Arthritis     | 1.48 (1.07, 2.04)    | 0.018    | 3.33 (1.85, 5.99)                                | 6.29E-05 |
| Osteoarthritis           | 1.20 (1.02, 1.41)    | 0.030    | 1.52 (1.05, 2.21)                                | 0.027    |

**Table S2.** Models for COVID-19 test positivity and inpatient test positivity: M1 and M2.

|                                         | M1: current chronological age                    |                                                            | M2: current chronological age + PhenoAgeAccel    |                                                            |
|-----------------------------------------|--------------------------------------------------|------------------------------------------------------------|--------------------------------------------------|------------------------------------------------------------|
|                                         | Positive vs. untested or negative<br>(n=418,681) | Inpatient positive vs. untested or negative<br>(n=418,189) | Positive vs. untested or negative<br>(n=346,074) | Inpatient positive vs. untested or negative<br>(n=345,684) |
| Sex <sup>1</sup> (=Male)                | <b>1.33 (1.20, 1.48)</b><br>p=5.32e-8            | <b>1.51 (1.33, 1.72)</b><br>p=1.77e-10                     | <b>1.27 (1.13, 1.43)</b><br>p=6.63e-5            | <b>1.38 (1.19, 1.59)</b><br>p=1.44e-5                      |
| Ethnicity <sup>2</sup>                  |                                                  |                                                            |                                                  |                                                            |
| Black                                   | <b>3.47 (2.73, 4.42)</b><br>p=4.76e-24           | <b>3.22 (2.35, 4.43)</b><br>p=5.84e-13                     | <b>3.27 (2.48, 4.31)</b><br>p=4.80e-17           | <b>2.96 (2.05, 4.28)</b><br>p=6.90e-9                      |
| Other (incl. Asian, Chinese, and Mixed) | <b>2.09 (1.71, 2.57)</b><br>p=1.09e-12           | <b>2.39 (1.88, 3.04)</b><br>p=1.68e-12                     | <b>2.03 (1.61, 2.56)</b><br>p=2.33e-9            | <b>2.21 (1.67, 2.93)</b><br>p=2.96e-8                      |
| Current Age (per 5 years)               | <b>1.03 (1.00, 1.06)</b><br>p=0.075              | <b>1.12 (1.08, 1.17)</b><br>p=2.08e-8                      | <b>1.04 (1.01, 1.08)</b><br>p=0.020              | <b>1.13 (1.08, 1.18)</b><br>p=1.90e-7                      |
| PhenoAgeAccel (per 5 years)             |                                                  |                                                            | <b>1.30 (1.24, 1.38)</b><br>p=1.78e-22           | <b>1.34 (1.25, 1.43)</b><br>p=1.03e-18                     |

<sup>1</sup>reference: female; <sup>2</sup>reference: White; in bold if p<0.05; assessment center results skipped

**Table S3.** Models for COVID-19 test positivity and inpatient test positivity: M3 and M4.

|                                                                 | M3: current chronological age + diseases            |                                                         | M4: current chronological age + PhenoAgeAccel + diseases |                                                         |
|-----------------------------------------------------------------|-----------------------------------------------------|---------------------------------------------------------|----------------------------------------------------------|---------------------------------------------------------|
|                                                                 | Positive alive vs. untested or negative (n=418,644) | Inpatient positive vs. untested or negative (n=418,152) | Positive alive vs. untested or negative (n=346,055)      | Inpatient positive vs. untested or negative (n=345,665) |
| Sex <sup>1</sup> (=Male)                                        | <b>1.24 (1.12, 1.38)</b><br>p=6.91e-5               | <b>1.40 (1.22, 1.59)</b><br>p=7.03e-7                   | <b>1.23 (1.09, 1.39)</b><br>p=6.54e-4                    | <b>1.33 (1.14, 1.54)</b><br>p=1.99e-4                   |
| Ethnicity <sup>2</sup>                                          |                                                     |                                                         |                                                          |                                                         |
| Black                                                           | <b>3.05 (2.39, 3.89)</b><br>p=3.62e-19              | <b>2.82 (2.04, 3.89)</b><br>p=2.85e-10                  | <b>3.02 (2.28,4.00)</b><br>p=9.38e-15                    | <b>2.72 (1.88, 3.94)</b><br>p=1.28e-7                   |
| Other (incl. Asian, Chinese, and Mixed)                         | <b>1.90 (1.54, 2.33)</b><br>p=1.09e-9               | <b>2.10 (1.65, 2.69)</b><br>p=2.70e-9                   | <b>1.89 (1.49, 2.39)</b><br>p=1.07e-7                    | 2.00 (1.51, 2.66)<br>p=1.68e-6                          |
| Current Age (per 5 years)                                       | <b>0.94 (0.91, 0.98)</b><br>p=0.001                 | <b>1.03 (0.98, 1.07)</b><br>p=0.215                     | <b>0.97 (0.93, 1.01)</b><br>p=0.093                      | <b>1.04 (0.99, 1.10)</b><br>p=0.090                     |
| PhenoAgeAccel (per 5 years)                                     |                                                     |                                                         | <b>1.15 (1.08, 1.21)</b><br>p=3.20e-6                    | <b>1.15 (1.07, 1.23)</b><br>p=6.88e-5                   |
| Dementia (46 pos., 24 inpatient pos.)                           | <b>8.56 (6.15, 11.91)</b><br>p=3.89e-37             | <b>5.79 (3.73, 8.99)</b><br>p=5.28e-15                  | <b>8.83 (6.14, 12.69)</b><br>p=6.59e-32                  | <b>6.00 (3.69, 9.76)</b><br>p=5.01e-13                  |
| Type II diabetes (201 pos., 157 inpatient pos.)                 | <b>1.61 (1.36, 1.90)</b><br>p=2.94e-8               | <b>1.76 (1.45, 2.13)</b><br>p=1.05e-8                   | <b>1.50 (1.24, 1.82)</b><br>p=3.51e-5                    | <b>1.69 (1.35, 2.11)</b><br>p=3.56e-6                   |
| History of pneumonia (124 pos., 95 inpatient pos.)              | <b>1.95 (1.60, 2.38)</b><br>p=3.66e-11              | <b>2.15 (1.71, 2.69)</b><br>p=5.01e-11                  | <b>1.82 (1.45, 2.28)</b><br>p=1.73e-7                    | <b>1.83 (1.40, 2.39)</b><br>p=8.43e-6                   |
| Depression (174 pos., 124 inpatient pos.)                       | <b>1.28 (1.09, 1.52)</b><br>p=0.003                 | <b>1.43 (1.17, 1.74)</b><br>p=3.90e-4                   | <b>1.40 (1.16, 1.67)</b><br>p=3.36e-4                    | <b>1.47 (1.18, 1.84)</b><br>p=5.53e-4                   |
| Atrial fibrillation (126 pos., 94 inpatient pos.)               | <b>1.61 (1.32, 1.97)</b><br>p=2.95e-6               | <b>1.58 (1.26, 2.00)</b><br>p=1.02e-4                   | <b>1.56 (1.25, 1.95)</b><br>p=8.63e-5                    | <b>1.58 (1.22, 2.04)</b><br>p=4.97e-4                   |
| Hypertension (670 pos., 472 inpatient pos.)                     | <b>1.30 (1.16, 1.46)</b><br>p=1.17e-5               | <b>1.28 (1.11, 1.48)</b><br>p=8.03e-4                   | <b>1.25 (1.00, 1.43)</b><br>p=9.07e-4                    | <b>1.24 (1.05, 1.46)</b><br>p=0.010                     |
| COPD (110 pos., 85 inpatient pos.)                              | <b>1.55 (1.25, 1.93)</b><br>p=5.54e-5               | <b>1.61 (1.26, 2.07)</b><br>p=1.41e-4                   | <b>1.45 (1.14, 1.85)</b><br>p=0.003                      | <b>1.56 (1.18, 2.07)</b><br>p=0.002                     |
| Chronic kidney disease (55 pos., 38 inpatient pos.)             | <b>1.93 (1.45, 2.58)</b><br>p=7.06e-6               | <b>1.75 (1.24, 2.47)</b><br>p=0.001                     | <b>1.77 (1.28, 2.44)</b><br>p=5.64e-4                    | <b>1.67 (1.14, 2.45)</b><br>p=0.008                     |
| Liver disease (42 pos., 33 inpatient pos.)                      | 1.32 (0.96, 1.82)<br>p=0.083                        | <b>1.48 (1.03, 2.12)</b><br>p=0.033                     | 1.40 (0.99, 1.98)<br>p=0.054                             | <b>1.51 (1.01, 2.25)</b><br>p=0.043                     |
| Rheumatoid Arthritis (38 pos., 31 inpatient pos.)               | 1.11 (0.80, 1.55)<br>p=0.527                        | 1.32 (0.91, 1.90)<br>p=0.142                            | 0.99 (0.68, 1.45)<br>p=0.956                             | 1.14 (0.75, 1.75)<br>p=0.544                            |
| Coronary artery disease (220 pos., 172 inpatient pos.)          | 1.08 (0.92, 1.27)<br>p=0.349                        | 1.16 (0.96, 1.40)<br>p=0.129                            | 1.09 (0.91, 1.30)<br>p=0.374                             | 1.15 (0.93, 1.42)<br>p=0.194                            |
| History of delirium (13 pos., 5 inpatient pos.)                 | 1.34 (0.73, 2.44)<br>p=0.341                        | 0.70 (0.28, 1.78)<br>p=0.458                            | 1.30 (0.67, 2.52)<br>p=0.443                             | 0.66 (0.23, 1.89)<br>p=0.444                            |
| Stroke (46 pos., 34 inpatient pos.)                             | 1.19 (0.88, 1.62)<br>p=0.266                        | 1.23 (0.86, 1.76)<br>p=0.249                            | 1.34 (0.97, 1.85)<br>p=0.077                             | 1.35 (0.93, 1.98)<br>p=0.118                            |
| Asthma (226 pos., 153 inpatient pos.)                           | 0.96 (0.83, 1.12)<br>p=0.607                        | 0.96 (0.80, 1.15)<br>p=0.667                            | 0.96 (0.81, 1.13)<br>p=0.611                             | 0.92 (0.75, 1.13)<br>p=0.441                            |
| Previous falls/fragile fractures (387 pos., 256 inpatient pos.) | 1.08 (0.96, 1.22)<br>p=0.194                        | 1.05 (0.91, 1.22)<br>p=0.482                            | 1.04 (0.90, 1.19)<br>p=0.613                             | 0.99 (0.84, 1.17)<br>p=0.926                            |
| Osteoarthritis (175 pos., 124 inpatient pos.)                   | 1.02 (0.86, 1.20)<br>p=0.859                        | 1.00 (0.83, 1.22)<br>p=0.962                            | 0.97 (0.81, 1.17)<br>p=0.759                             | 0.97 (0.77, 1.21)<br>p=0.774                            |

<sup>1</sup>reference: female; <sup>2</sup>reference: White; in bold if p<0.05; assessment center results skipped

**Table S4.** Details of included diseases; International Classification of Diseases 10th revision (ICD-10) codes included from inpatient hospital records

|                                       | <b>ICD-10 Codes</b>                                                         |
|---------------------------------------|-----------------------------------------------------------------------------|
| Coronary artery disease               | I20–I25                                                                     |
| Atrial fibrillation                   | I48                                                                         |
| Stroke                                | G45-G46; I61; I63                                                           |
| Hypertension                          | I10-I15                                                                     |
| Diabetes (Type 2)                     | E11                                                                         |
| Chronic kidney disease                | N18; N183; N184; N185; Y841                                                 |
| Depression                            | F32; F33; F34.1                                                             |
| Dementia                              | F00; F01; F02; F03; G30                                                     |
| Asthma                                | J45-J46                                                                     |
| Chronic obstructive pulmonary disease | J42-J44                                                                     |
| Osteoporosis                          | M80; M81; M811; M812; M813; M814; M815; M816; M818; M819                    |
| Osteoarthritis                        | M15.0; M15.1; M15.2; M15.9; M16.0; M16.1; M17.0; M17.1; M18.0; M18.1; M19.0 |
| Liver disease                         | K70-K77                                                                     |
| Delirium                              | F05                                                                         |
| Pneumonia                             | J13; J14; J15; J16; J17; J18                                                |
| Falls/Fragility fractures             | W00; W01; W04; W05; W06; W07; W08; W10; W17; W18; W19; R296                 |
|                                       | S220; S32; S325; S328; S422-S424; S524; S525; S720-S722; S582; S5823; T08   |
